# Supplementary material
Source: PubMed Central journal article supplement (PMC6405406)

**Additional File 2. Leave-one-out meta-analysis with -1082 G/A recessive model**

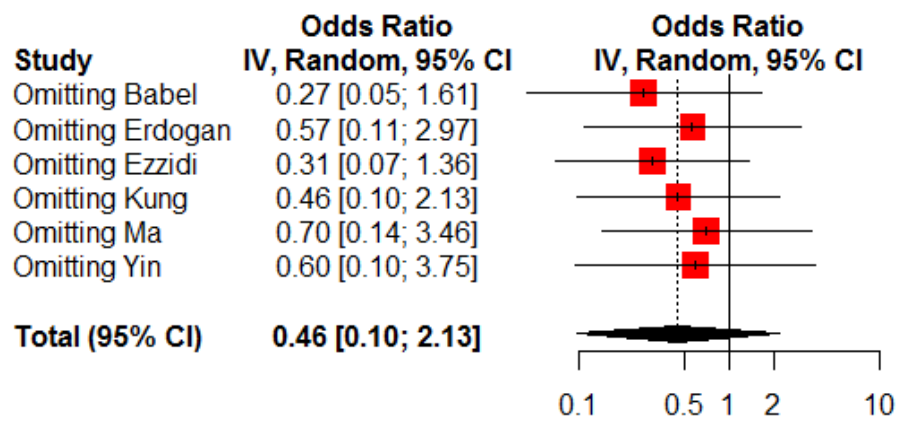

Supplement: 40200_2018_349_MOESM2_ESM.pdf [file 40200_2018_349_MOESM2_ESM.pdf]
